# Supplementary material
Source: PubMed Central journal article supplement (PMC2923900)
Supplement: pp.110.157875_1.pdf [file pp.110.157875_1.pdf]

# Supplemental Figure S1

|          |                   |                                                                                                                           |
|----------|-------------------|---------------------------------------------------------------------------------------------------------------------------|
| <b>A</b> | <b>CrSULTR1</b>   | RRNRPSSAGSAVAQADGSMAPSTSLLLHPDGAGAALPSSSSMMPTDCSVINRHRGAAGASSGGAOMEFHWENTNGNADRSSVHGILQKQWERSKSSYLKMSITYSALDWLAFPLPCVRMLR |
|          | <b>CrSULTR2</b>   | MKRNISN-----VDTGVVPAPLNS---TPSTRLIQNS-YGDSKYET--ERMEFPPEDPRYHPRDSVKG---ANEWKEDHHHRVATYNNWVDWLAFFIPCVRMHR                  |
|          | <b>AtSULTR4;1</b> | MSYASLS-----VKDLDS---LVSRSGTGSSSSLKPPQGRPVKVIPLQHPDTSNEARPPSTIP-----FDIFSGWTAKIKRMRLVDWIDTIFPCSRMLR                       |
|          | <b>AtSULTR1;2</b> | -----MSSRAHPVDGSPAITDGHVPMKPSPTRHVKVGFEPKQNMFKDMYTFKTE---FFHDPLDRDFKQPKSKQMLQLQSVPVDFWGR                                  |
|          | <b>ShSHST1</b>    | MSQRVSD-----QVMADVIAETRSNSSSHRRGGGSGDDTTSLPYMHKVGTFPKQFLFQEIKHSFNED---FFPKPFPGFKFDQSGFRKLELGLQVIFPILLEWGR                 |
|          | <b>CrSULTR1</b>   | TYKIREYLFADIVAGISVGFVWVWPGQMSYANLAGLESVYGLYQAFLEVITVALVGSRRQLANGPVAVVSTLHCSSLQELVPGAETISLNPIQ-LTPDQVIECKYNNLAIQSLVLAHLYT  |
|          | <b>CrSULTR2</b>   | TYR-RSYLLNDIVAGISVGFVWVWPGQMSYANLAGLESVYGLYQAFLEVITVALVGSRRQLANGPVAVVSTLHLLKLDLPEAAGISNPNIPGSELDPAVOBYRLAIIQAFVLAQVLT     |
|          | <b>AtSULTR4;1</b> | TYRWSEYFKLDLIVAGISVGFVWVWPGQMSYANLAGLESVYGLYSSVFVVFVAIFGSSRRDIAIGPVAVVSLLLVSNALGGIA-----DNBELHIELALHILVGLIEC              |
|          | <b>AtSULTR1;2</b> | NYTFKKRFG-DLISGHTVAGLCPIDPQISYAKLANLDPFVGLYSSVFVVFVAIFGSSRRDIAIGPVAVVSLLLGLLRAEIDP-----NPSDVEYLRLAFTAFFAFSITEA            |
|          | <b>ShSHST1</b>    | HYDLKKFRG-DFIAGITIASLCIPQDLAYAKLANLDPVGLYSSVFVVFVAIFGSSRRDIAIGPVAVVSLLLGLLRAEIDP-----NKGSHVYLRLAFTAFFAFSVQTQ              |
|          | <b>CrSULTR1</b>   | SVGFVRLGFIINFLSHVIGSFTSGAAITIGLSCVCHVWLKYLHGISIP---RERLHDQVSYTIEFIRNLKWOQFIMGSTFVLLVITWRKVKRSRHRFVWLRPLGELISVCHALLAVY     |
|          | <b>CrSULTR2</b>   | GVSHFRLGFVWFLSHAVIGSFTSGAAITIGLSCV---KYLIGSIP---RDRLDQQAQKYVDNMMKWOQFIMGSTFVLLVITWRKVKRSRHRFVWLRPLGELISVCHALLAVY          |
|          | <b>AtSULTR4;1</b> | IMGHRLGLLRFVSHSVISGFTSASAIYGLSCL---KYFLGYSTA---RBSKTVFIVESIITAGADKQWPPFVWMSLITVILVQVMKVKRKKLQELQRAAAPLIGVILGTIAIK         |
|          | <b>AtSULTR1;2</b> | ALGFVRLGFIIDFLSHAAVVGFTSGAAITIGLSCV---KGLFGKCK---FTKKTDLISVLSVFKAAHGWNVQITLLGASFTLLETLSKILCKRSKRLWPAIAPLISVYVDFVRY        |
|          | <b>ShSHST1</b>    | LLSVKRLGFIIDFLSHAAVVGFTSGAAITIGLSCV---KGLLGISNNTTKKTDIISVMSVWTVHVEGWNVQITLLGASFTLLETLSKILCKRSKRLWPAIAPLISVYVDFVRY         |
|          | <b>CrSULTR1</b>   | TSVDRKGRKIKGAIKKGLETP-TVGVWAPMPDFVLDLPIAHVVMVLDLESTSIARALANKKRYELVANGELVGLGANFASAAHGYSTTGSFSSRAVNNESSGAKTGLAGFVTAWVVG     |
|          | <b>CrSULTR2</b>   | VGNVQNKGRKIKGAIKAGLEP-TVSMVMPPEISQLEFPAIVVMVLDLESTSIARALANKKRYELVANGELVGLGANFASAAHGYSTTGSFSSRAVNNESSGAKTGLAGFVTAWVVG      |
|          | <b>AtSULTR4;1</b> | VFHPPS--TSVWGTPOGLE---TFSFPRSFDAKTIETTSALITGPILESVGLAKALAAKNYELSDSDFGLGVANILSFPSPVATGSPSSRAVNNESSGAKTGLSGLTTRITIG         |
|          | <b>AtSULTR1;2</b> | ITRADKQGVVILKIDCGINPSSFLIYFGNDLAKGRIGVAGMVAITPAVALCRITFRAMKVDIIDCKMDFVLEEMANVSSMSCYATGSPSSRAVNNESSGAKTGLAGFVTAWVVG        |
|          | <b>ShSHST1</b>    | ITRADKQGVVILKIDCGINPSSFLIYFGNGLYGVAGMVAITPAVALCRITFRAMKVDIIDCKMDFVLEEMANVSSMSCYATGSPSSRAVNNESSGAKTGLAGFVTAWVVG            |
|          | <b>CrSULTR1</b>   | FVLLFLTPVREKLEPYHLSAIVCSVSVIGLHVEYEAIVLWKVVKLDFVMMASLCHLHSHSIEGLSIAHGLAMLIVYESAHPHTAMGRIPGSGVVRNKOYVPSQITPCHTVMRISDF      |
|          | <b>CrSULTR2</b>   | FVLEFLTPVRAHLPYHLSAIVCSVSVIGLHVEYEAIVLWKVVKLDFVMMASLCHLHSHSIEGLSIAHGLAMLIVYESAHPHTAMGRIPGTRIRNKOYPAQIAPGLVFRIDAP          |
|          | <b>AtSULTR4;1</b> | CSLLFLTPFKYVQCALAAIVTSAVSGLVYDEAFLWRVDRKDFSLTITSTTILDFGIEIGLVGCVGSDIARVHESANPHAVLGLRPGTVVRNKOYPAQIAPGLVFRIDAP             |
|          | <b>AtSULTR1;2</b> | LTLLFLTPFKYVQCALAAIIVNAVIPDLIQALLKVKDKLDFACIGAFGVIFQVEYETRDQLAISNENKDFHLTARSQFAVLEKWEFFVHDAVYVQVQVQSSNLEDK---             |
|          | <b>ShSHST1</b>    | LTLLVITLTPFKYVQCALAAIIVRAVNVNIBAMVLWKIDKDFVACVQGFVGFHKSVEIGLLIAVAISPAKILLOVTRPRTAVLGLRPGTVVRNKOYPAQIAPGLVFRIDAP           |
|          | <b>CrSULTR1</b>   | LYFANVQMIKRLRVYEDRHRDWS---GEGHTKLEFALIDMSPVTHIDATGVHLESWIEHFVAVGTOVLVLSVSVKVIRELDTAIVPDMGKDMFVTVHDAVYVQVQSSNLEDK---       |
|          | <b>CrSULTR2</b>   | LYFANVQMIKRELREGASAHRWS---QEHGVPLEYVLDSPVTHIDATGHLEIVTETLAGHGTQVVLNANSEQETIADMRRGGLFDMGQVDFVHVTNVAVYVQVQSSNLEDK---        |
|          | <b>AtSULTR4;1</b> | LYFANVQMIKRLREYEAADKYTNRELVDRINVELEMSPVTHIDATGSSVALEKELKYQVEYETRDQLAISNENKDFHLTARSQFAVLEKWEFFVHDAVYVQVQVQSSNLEDK---       |
|          | <b>AtSULTR1;2</b> | LYFNSNVIYRETRQRLWHEEKEVK-AASLPRIQVLEEMSPVTHIDATGSHALDPLKSLQKRDQLLANEGPLVTKLHLSHFADMGQDNYLYTVADVAQVQVQSSNLEDK---           |
|          | <b>ShSHST1</b>    | LYFNSNVIYKERILRWLIDEGAQRT-ESELPETQHLIEMSPVTHIDATGSHALDPLKSLQKREVQLLANEGPLVLEKHLASKLLETIGEDKLEHVTADVAVYVQVQSSNLEDK---      |
|          | <b>CrSULTR1</b>   | -----PLSMQQPSSTSDE-----                                                                                                   |
|          | <b>CrSULTR2</b>   | NTSSYPHFGSRRTPGALPAPSSQLDSSPSTVPESTSGTPAAGTYVSGIAGVAVAGHTAAGNGGSHSPSAQPGVQLTTTGSQRQO                                      |
|          | <b>AtSULTR4;1</b> | -----HLSPTRRYGSSNNSSSNALLKEPLLVEK-----                                                                                    |
|          | <b>AtSULTR1;2</b> | -----                                                                                                                     |
|          | <b>ShSHST1</b>    | -----                                                                                                                     |
| <b>B</b> | <b>CrSLT1</b>     | -----                                                                                                                     |
|          | <b>CrSLT2</b>     | -----                                                                                                                     |
|          | <b>CrSLT3</b>     | -----                                                                                                                     |
|          | <b>PpST</b>       | MTRSMPLYRGEQEMWFSHTESIKTTPSATTNAPLSDGIRIPRPHVGRVGGPDMHRNPDLRNVAVLLSCSVQGEVLDLGVVPGAKPALYCNFGFMISSLNLCVMNCLFEFDFVESAENS    |
|          | <b>CrSLT1</b>     | -----MAALSNQGIIVAVITFALAVVMAADWVGDITFTVLLAFLTAFDQCIIVTAKAAAGYQNTGLLTVVFLYVWABGITOQGGLELIMNYVLRGRSRVHWALVRSMFPVMVLS        |
|          | <b>CrSLT2</b>     | -----MGRSNQGSYIAFLAVVMAADWVGDITFTVLLAFLTAFDQCIIVTAKAAAGYQNTGLLTVVFLYVWABGITOQGGLELIMNYVLRGRSRVHWALVRSMFPVMVLS             |
|          | <b>CrSLT3</b>     | -----MAALSNQGIIVAVITFALAVVMAADWVGDITFTVLLSWLTAFTDCKIITVAKAAAGYQNTGLLTVVFLYVWABGITOQGGLELIMNYVLRGRSRVHWALVRSMFPVMVLS       |
|          | <b>PpST</b>       | GRELRRSDKVMQLGNSYLVATLTIAGVMAADWVGDITFTVFLMVGFLTAICR---VITVKESTETGFSQNGVLTWVFLVWABGITOQGGMKALANLIGKATSPFWALTIRMFIPVAVITS  |
|          | <b>CrSLT1</b>     | AFILNNTPCVTFMIPILLSWGRGCVPIKLLIPLSYAAVVGCTCTSIGTSTNLVIVGLQDARYRQSKVDQAKFOIFDIAPYGVYALWGFVILLACGFLLPGNSSRYAKDLLLAVRVL      |
|          | <b>CrSLT2</b>     | AFILNNTPCVTFMIPILLSWGRGCVPIKLLIPLSYAAVVGCTCTSIGTSTNLVIVGLQDARYRQSKVDQAKFOIFDIAPYGVYALWGFVILLACGFLLPGNSSRYAKDLLLAVRVL      |
|          | <b>CrSLT3</b>     | AFILNNTPCVTFMIPILLSWGRGCVPIKLLIPLSYAAVVGCTCTSIGTSTNLVIVGLQDARYRQSKVDQAKFOIFDIAPYGVYALWGFVILLACGFLLPGNSSRYAKDLLLAVRVL      |
|          | <b>PpST</b>       | AFILNNTPCVTFMIPILLSWGRGCVPIKLLIPLSYAAVVGCTCTSIGTSTNLVIVGLQDARYRQSKVDQAKFOIFDIAPYGVYALWGFVILLACGFLLPGNSSRYAKDLLLAVRVL      |
|          | <b>CrSLT1</b>     | PSSSVVKKLKDSDGLQCGFDVAIVRNGOLIKISDESIVLDGGDILVYSGELDVVEFVGEENGLAVNCOBE---IAAERPFSGSEEVFSAANGAAPYHR---LVQAQKSKTSDLIGRT     |
|          | <b>CrSLT2</b>     | PSSSVVKKLKDSDGLQCGFDVAIVRNGOLIKISDESIVLDGGDILVYSGELDVVEFVGEENGLAVNCOBE---IAAERPFSGSEEVFSAANGAAPYHR---LVQAQKSKTSDLIGRT     |
|          | <b>CrSLT3</b>     | TT-----IQOS-----SNEPTTRACROVDEDTVLEENDILYAGLEDOVVEFVGEENGLAVNCOBE---IAAERPFSGSEEVFSAANGAAPYHR---LVQAQKSKTSDLIGRT          |
|          | <b>PpST</b>       | PEVVAANTVREAGLQMERLPLVVRGSGVTHVAGVQYLLEPDDILYFCGLEDOVVEFVGEENGLAVNCOBE---IAAERPFSGSEEVFSAANGAAPYHR---LVQAQKSKTSDLIGRT     |
|          | <b>CrSLT1</b>     | VREVSWQGRFGLIPVAIQRNGREDGRINDVLAAGDVLDDTTPFYDEDRERHINFNFGKLEAVDKGAKEFVIGVKVKSSEVWNTVSAAGLRGIPGLFVLSVDRADGSSVSDSYL         |
|          | <b>CrSLT2</b>     | VREVSWQGRFGLIPVAIQRNGREDGRINDVLAAGDVLDDTTPFYDEDRERHINFNFGKLEAVDKGAKEFVIGVKVKSSEVWNTVSAAGLRGIPGLFVLSVDRADGSSVSDSYL         |
|          | <b>CrSLT3</b>     | VREVSWQGRFGLIPVAIQRNGREDGRINDVLAAGDVLDDTTPFYDEDRERHINFNFGKLEAVDKGAKEFVIGVKVKSSEVWNTVSAAGLRGIPGLFVLSVDRADGSSVSDSYL         |
|          | <b>PpST</b>       | LDQIDFRKREDVAVLGLRGETHQEGEISEVWNAVDVLLGDNEEVLQKPVKAVEK-IVEKLEALBKEVLTENKVTNFRKGVKGTIVYDAGLRGIPGLFVLSVDRADGSSVSDSYL        |
|          | <b>CrSLT1</b>     | YKIQPDITWIAADVAAGVLSKFPGLLEVQOQVDKTGTSILYRHLVQAAVSHKGLPVGKTVRDRFRTLYNAAVVAHREGNARHPLKQVDIVLQCGDVLILSCHTNWADEHRHDKSFV      |
|          | <b>CrSLT2</b>     | YKIQPDITWIAADVAAGVLSKFPGLLEVQOQVDKTGTSILYRHLVQAAVSHKGLPVGKTVRDRFRTLYNAAVVAHREGNARHPLKQVDIVLQCGDVLILSCHTNWADEHRHDKSFV      |
|          | <b>CrSLT3</b>     | YKIQPDITWIAADVAAGVLSKFPGLLEVQOQVDKTGTSILYRHLVQAAVSHKGLPVGKTVRDRFRTLYNAAVVAHREGNARHPLKQVDIVLQCGDVLILSCHTNWADEHRHDKSFV      |
|          | <b>PpST</b>       | TVVETCDTLNFGSVQGFHPLFKISGLERSQAVQVSKLRADILYRHLVQAAVSHKGLPVGKTVRDRFRTLYNAAVVAHREGNARHPLKQVDIVLQCGDVLILSCHTNWADEHRHDKSFV    |
|          | <b>CrSLT1</b>     | LVQVPDSSPKRSRMLIGVLLATGMVLQIIVGG-LKKKEYIHLWPAVLLTAALMLLTCMNADQARKAIMDVLVITAAAFVGSAALEGTGVAAFANALISIGKLAGGTGAALIAIYI       |
|          | <b>CrSLT2</b>     | LVQVPDSSPKRSRMLIGVLLATGMVLQIIVGG-LKRSEYIHLWPAVLLTAALMLLTCMNADQARKAIMDVLVITAAAFVGSAALEGTGVAAFANALISIGKLAGGTGAALIAIYI       |
|          | <b>CrSLT3</b>     | LVQVPDSSPKRSRMLIGVLLATGMVLQIIVGG-LKRKEYIHLWPAVLLTAALMLLTCMNADQARKAIMDVLVITAAAFVGSAALEGTGVAAFANALISIGKLAGGTGAALIAIYI       |
|          | <b>PpST</b>       | LISGVESSPVKRSRMLIGVLLATGMVLQIIVSSITGGTILNLFIAIILSGLMLLTCGLSDAQARNSILRVVITFALAFASFCWCKSKLARALADIRHLSIESIGMGRASVAIYI        |
|          | <b>CrSLT1</b>     | ATALLSELLTNNAAAGAIMYPAIADGALKIPKDTSVAILMGASAGFINPFSYQTNLMVYAAGNYSVREFAIIVGAPFQVLMIVAGFILLVNRQHWQVIVSWICTAGIVLLPALYFLL     |
|          | <b>CrSLT2</b>     | ATALLSELLTNNAAAGAIMYPAIADGALKIPKDTSVAILMGASAGFINPFSYQTNLMVYAAGNYSVREFAIIVGAPFQVLMIVAGFILLVNRQHWQVIVSWICTAGIVLLPALYFLL     |
|          | <b>CrSLT3</b>     | ATAVVSELLTNNAAAGAIMYPAIADGALKIPKDTSVAILMGASAGFINPFSYQTNLMVYAAGNYSVREFAIIVGAPFQVLMIVAGFILLVNRQHWQVIVSWICTAGIVLLPALYFLL     |
|          | <b>PpST</b>       | ATALLSELLTNNAAAGAIMYPAIADGALKIPKDTSVAILMGASAGFINPFSYQTNLMVYAAGNYSVREFAIIVGAPFQVLMIVAGFILLVNRQHWQVIVSWICTAGIVLLPALYFLL     |
|          | <b>CrSLT1</b>     | PTRIKIKIDGFFERIAAVLNPKAALERRSRRQ-----VSHRTTDSGSSSSE---LPAKLVIA-                                                           |
|          | <b>CrSLT2</b>     | PTVQVIRIDAFDRVAQNLNPKAALERRSRRQ-----ASATSGSGSSDSPR-ALCVKIVITA                                                             |
|          | <b>CrSLT3</b>     | HTVQNRMAFFDRIDAEINPRAALQRRRSRRQCSFGGKAMSVDGTSRDTGSSSTPVALTFTIEMPKQVVR                                                     |
|          | <b>PpST</b>       | BEVPAIRSRFSFGSKE-----KTEKIEQ-----                                                                                         |

**Supplemental Figure S1.** Amino acid sequence alignments of  $\text{SO}_4^{2-}$  transporter proteins. **A.** Predicted CrSULTR1 and CrSULTR2 amino acid sequences were aligned with each other and with representative *Arabidopsis thaliana* and *Stylosanthes hamata* high-affinity  $\text{SO}_4^{2-}$  transporters using BioEdit version 7.0.9.0 software. **B.** Predicted CrSLT1, CrSLT2, CrSLT3 proteins were aligned with each other and a putative  $\text{SO}_4^{2-}$  permease from *Physcomitrella patens* (PpST). Black and grey shadings indicate identical and similar amino acid residues, respectively. The red bar (**A**) highlights the C-terminal STAS domain and the blue bar (**A**) represents the region of CrSULTR2 used as an antigen for antibody production. The magenta bar (**B**) indicates the peptide sequence in SLT2 that is recognized by the SLT2 antibody; the orange bar indicates the TrkA-C domain, and the green bar (**B**) shows the region recognized by the general SLT antibody.

## Supplemental Figure S2

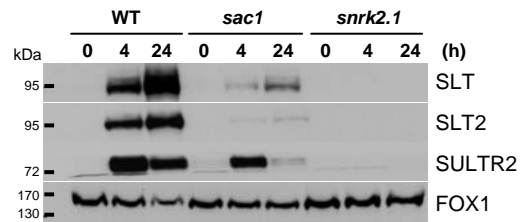

**Supplemental Figure S2.** SULTR2, SLT1, and SLT2 polypeptide abundances in wild-type 21gr (WT), *sac1*, and *snrk2.1* strains. The time courses show accumulation of SLT1, SLT2, and SULTR2 polypeptides following transfer of cells from S-replete to S-deficient medium. Samples were taken prior to, and 4 and 24 h after the cells were transferred. The ferroxidase, FOX1, protein served as a loading control.

## Supplemental Figure S3

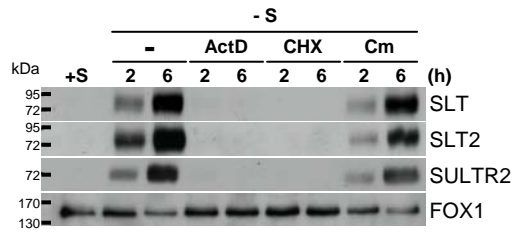

**Supplemental Figure S3.** Cycloheximide inhibition of accumulation of the  $\text{SO}_4^{2-}$  transporter protein during S deprivation. *Chlamydomonas* cells were grown in TAP and then transferred to TAP-S medium. At the time of S removal, a transcriptional inhibitor actinomycin D (ActD), a cytosolic translational inhibitor cycloheximide (CHX), or an organellar translational inhibitor chloramphenicol (Cm), was added to the cultures. Samples were taken prior to starvation as well as 2 and 6 h after the removal of S. The ferroxidase protein, FOX1, served as the loading control (accumulation of FOX1 is S-independent).

A

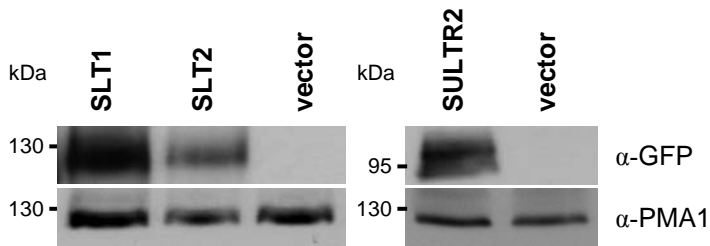

B

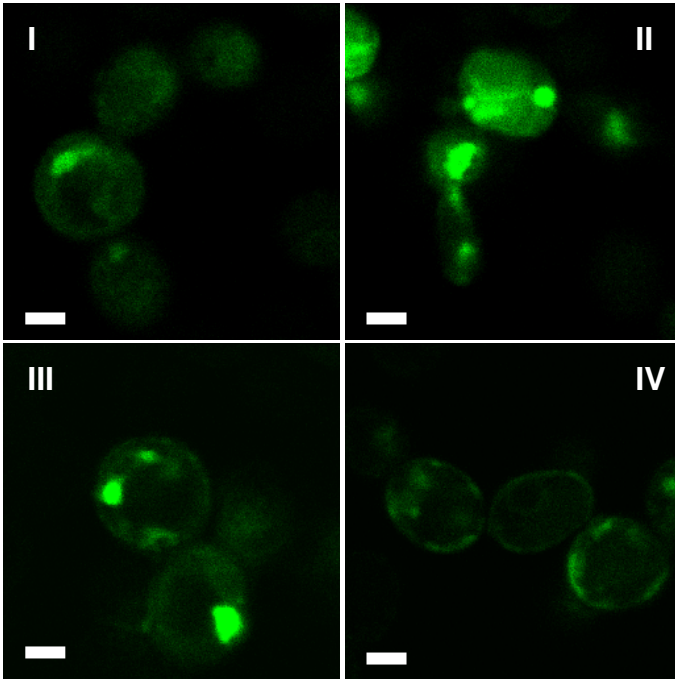

**Supplemental Figure S4.** The expression of  $\text{SO}_4^{2-}$  transporter-GFP fusion proteins in *S. cerevisiae* cells. **A.** CP60-1C cells transformed with an empty pDR196-GW-GFP, plasmids carrying SLT1, SLT2, or SULTR2 were grown to mid-logarithmic phase and the microsomal fraction was isolated, separated by SDS-PAGE and the immunoblot performed to detect the chimeric transporters tagged with GFP and a plasma membrane ATPase, PMA1. **B.** Confocal images of CP60-1C expressing the fusion proteins SULTR2-GFP (I), SLT1-GFP (II), SLT2-GFP (III) or AtSULTR1;2-GFP (IV). The bar on the image represents 3  $\mu$ m.

# Supplemental Figure S5

**A**

|                |                                                                                                                                 |
|----------------|---------------------------------------------------------------------------------------------------------------------------------|
| <b>WT-SLT1</b> | MAALSWQGI VAVTFTALAFV VMAADWV GPDITFTVLLAFLTA FDFGQIVTVAKAAAGYGN TGLLTVVFLYVVAEGITQTGGLELIMNYVLGRSRSVHVALVRSMPFV MVLSAFLNNTPCVT |
| <b>m-SLT1</b>  | MAALSWQGI VAVTFTALAFV VMAADWV GPDITFTVLLAFLTA FDFGQIVTVAKAAAGYGN TGLLTVVFLYVVAEGITQTGGLELIMNYVLGRSRSVHVALVRSMPFV MVLSAFLNNTPCVT |
| <b>WT-SLT1</b> | FMPILILISWGRRCGVP IKKLLIPLSYAAVLGGTCTSI GTSTNLVIVGLQDARYAKSKQVDQAKFQIFDIAPYGV PYPALWGFVIFLLAQGFLLPGNSSRYAKDLLLAVRVL PSSSVVKKLL  |
| <b>m-SLT1</b>  | FMPILILISWGRRCGVP IKKLLIPLSYAAVLGGTCTSI GTSTNLVIVGLQDARYAKSKQVDQAKFQIFDIAPYGV PYPALWGFVIFLLAQGFLLPGNSSRYAKDLLLAVRVL PSSSVVKKLL  |
| <b>WT-SLT1</b> | KDSGLLQNGFVDTAIYRNGQLIKISDPSIVLDGGDILYVSGELDVVEFV GEEYGLALVNQEQELAAERPF GSGEEAVFSANGAAPYHKLVQAKLSKTSDLIGRTVREVSWQGRFGLIPV       |
| <b>m-SLT1</b>  | KDSGLLQNGFVDTAIYRNGQLIKISDPSIVLDGGDILYVSGELDVVEFV GEEYGLALVNQEQELAAERPF GSGEEAVFSANGAAPYHKLVQAKLSKTSDLIGRTVREVSWQGRFGLIPV       |
| <b>WT-SLT1</b> | AIQRNGREDGR LSDVLLAAGDVLLLDITTFYDEDREDIKTNFDGK LHAVKDGAKEFVIGVKVKSAE VVGKTVSAAGLRGIPGLFVLSVDHADGTSV DSSDYLYKIQPDDTIWAADV        |
| <b>m-SLT1</b>  | AIQRNGREDGR LSDVLLAAGDVLLLDITTFYDEDREDIKTNFDGK LHAVKDGAKEFVIGVKVKSAE VVGKTVSAAGLRGIPGLFVLSVDHADGTSV DSSDYLYKIQPDDTIWAADV        |
| <b>WT-SLT1</b> | AAVGF LSKFPGLELVQEQVDK TGTSTILYRHLVQA AVSHKGLPVGKTVRDRVFRFTLYNAAVVA VHENARIP LKVDIVLQGGDVLLI SCHTNWADEHRHDKS FVLVQVPDSSPKR SR   |
| <b>m-SLT1</b>  | <u>LTWPPWASCPSSLAWSWCSRSRWRTRPGPSSSTATWCRPP</u>                                                                                 |
| <b>WT-SLT1</b> | MIIGVLLATGMVLTQIIGGLKNKEYIHLWPCAVLTAALMLLTGCMNADQTRKAIMD VYLTIAAAFVSAALEGTVAAK FANAIISIGKGAGGTGAALIAIYIATALLSELLTNNAAGA         |
| <b>m-SLT1</b>  | MIIGVLLATGMVLTQIIGGLKNKEYIHLWPCAVLTAALMLLTGCMNADQTRKAIMD VYLTIAAAFVSAALEGTVAAK FANAIISIGKGAGGTGAALIAIYIATALLSELLTNNAAGA         |
| <b>WT-SLT1</b> | IMYPAAIAGDALKITPKDTSVAIMLGASAGFVNPFSYQTNLMVYAAGNYSVREFAIVGAPQVWLMIVAGF ILVYRNQWHQVIVSWICTAGIVLLPALYFLLPTRIQIKIDGFFERIA          |
| <b>m-SLT1</b>  | IMYPAAIAGDALKITPKDTSVAIMLGASAGFVNPFSYQTNLMVYAAGNYSVREFAIVGAPQVWLMIVAGF ILVYRNQWHQVIVSWICTAGIVLLPALYFLLPTRIQIKIDGFFERIA          |
| <b>WT-SLT1</b> | AVLNPKAALERRRSLRRQVSHTRTDDSGSSGSPLPAPKIVA                                                                                       |
| <b>m-SLT1</b>  | AVLNPKAALERRRSLRRQVSHTRTDDSGSSGSPLPAPKIVA                                                                                       |

**B**

|                  |                                                                                                                                  |
|------------------|----------------------------------------------------------------------------------------------------------------------------------|
| <b>WT-SULTR2</b> | MKRNTSNVD TGGVPAPLNSTPSTR LIQNGYGD SKYETERMEFPFPEDPRYHPRDSVKGAW EKVKEDHHRVATYNWVDWLAFFIPCVRWLRTYRRSYLLNDIVAGISVGMVMPVQGLSYA      |
| <b>m-SULTR2</b>  | MKRNTSNVD TGGVPAPLNSTPSTR LIQNGYGD SKYETERMEFPFPEDPRYHPRDSVKGAW EKVKEDHHRVATYNWVDWLAFFIPCVRWLRTYRRSYLLNDIVAGISVGMVMPVQGLSYA      |
| <b>WT-SULTR2</b> | NLAGLPSVYGLYGAFLPCIVSVL GSSRQLAVGPVAVT SLLLGTKLKDILPEAAGISNPNIPGSELPDAVQEKYNRLAIQLAFLVACLTYG VGIIFRLGFVTFNFLSHAVIGGFTSGAAITI     |
| <b>m-SULTR2</b>  | NLAGLPSVYGLYGAFLPCIVSVL GSSRQLAVGPVAVT SLLLGTKLKDILPEAAGISNPNIPGSELPDAVQEKYNRLAIQLAFLVACLTYG VGIIFRLGFVTFNFLSHAVIGGFTSGAAITI     |
| <b>WT-SULTR2</b> | GLSQVKYILGISIPRQDRLQDQAKTYVDNMHNMKWQEFIMGTTFLLV LFKVEVGRSKRFKWRP IGPFLTVCIIGLCAVYVGNVQNKGIKIIGAIKAGLPAPT VSWFPMPEISQLFPT         |
| <b>m-SULTR2</b>  | GLSQVKYILGISIPRQDRLQDQAKTYVDNMHNMKWQEFIMGTTFLLV LFKVEVGRSKRFKWRP IGPFLTVCIIGLCAVYVGNVQNKGIKIIGAIKAGLPAPT VSWFPMPEISQLFPT         |
| <b>WT-SULTR2</b> | AIVVMLVDLLESTSIARALARKNKYELHANQEIVGLGLANFAGAI FNCTYTTGFSFRSAVNNEGAKTGLACFI TAWVVG FVLIIFLTPVFAHLPYCTLGAI IVSSIVGLLEYEQAIYLWK     |
| <b>m-SULTR2</b>  | AIVVMLVDLLESTSIARALARKNKYELHANQEIVGLGLANFAGAI FNCTYTTGFSFRSAVNNEGAKTGLACFI TAWVVG FVLIIFLTPVFAHLPYCTLGAI IVSSIVGLLEYEQAIYLWK     |
| <b>WT-SULTR2</b> | VNKL DVLVWMA SFLGVLFI SVEIGL GAIAGLAILIVIYESAF FNTALVGRIPGTTIWRNKIQYPNAQLAPGLLVFRIDAPIYFANI QWIKERLEGFASAH RVWSQEHGVPLE YVILDFSP |
| <b>m-SULTR2</b>  | VNKL DVLVWMA SFLGVLFI SVEIGL GAIAGLAILIVIYESAF FNTALVGRIPGTTIWRNKIQYPNAQLAPGLLVFRIDAPIYFANI QWIKERLEGFASAH RVWSQEHGVPLE YVILDFSP |
| <b>WT-SULTR2</b> | VTHIDATGLH TLETIVETLAGHGTVQVLANP SQEIIALMR RGLFDMIGR DYVITVNEAVTFC SRQMAERGYAVKEDNTSSYPHFGSRRTPGALPAPSQ LDDSSPPTSVTESTGTPAA      |
| <b>m-SULTR2</b>  | VTHIDATGLH TLETIVETLAGHGTVQVLANP SQEIIALMR RGLFDMIGR DYVITVNEAVTFC SRQMAERGYAVKEDNTSSYPHFGSRRTPGALPAPSQ LDDSSPPTSVTESTGTPAA      |
| <b>WT-SULTR2</b> | GTYSSIGGAVPAVAGHTAAGNGGSHSPSAQPGVQLIT TGSQRQQ                                                                                    |
| <b>m-SULTR2</b>  | <u>GTYSSIGGAVPAVAGHTAAGNGGSHSPSAQPGVQLIT TGSQRQQ</u>                                                                             |

**Supplemental Figure S5.** Amino acid sequence alignments of wild-type and the *SLT1* (A) and *SULTR2* (B) mutant gene products. The amino acid sequence of the proteins encoded by the *slt1* and *sultr2* mutant genes was deduced. In both cases, the insertions caused a frame-shift mutation generating a premature stop codon and the production of truncated proteins. The regions of amino acid sequences in the *slt1* and *sultr2* strains deviated from the corresponding wild-type polypeptides are underlined. Predicted proteins from wild-type (WT) and mutant (m) strains were aligned using BioEdit version 7.0.9.0 software.

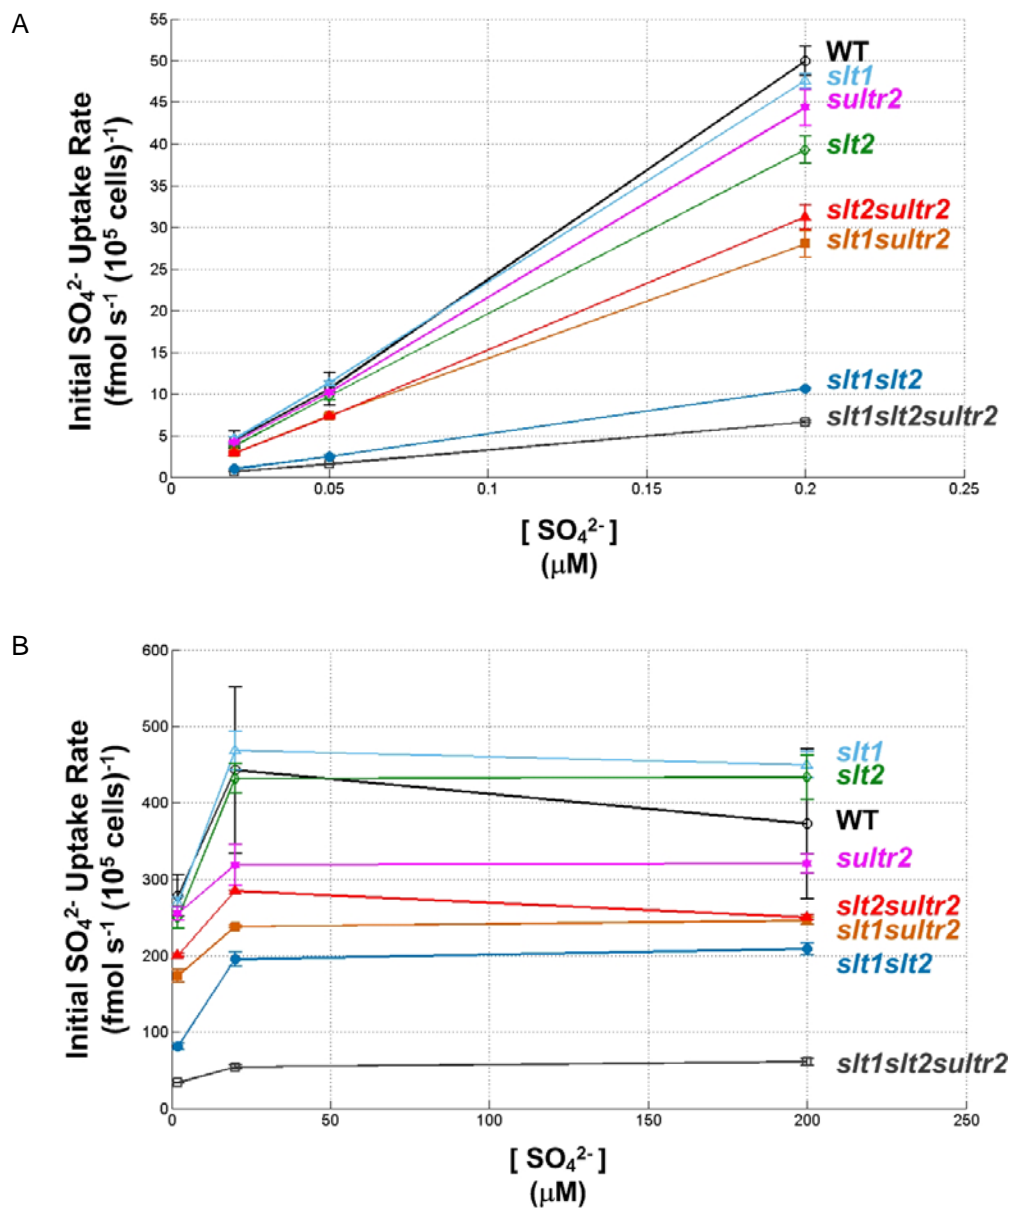

**Supplemental Figure S6.** Characteristics of SO<sub>4</sub><sup>2-</sup> transport in wild-type cells and single, double and triple mutants (progeny of a cross between a wild-type strain and an *slt1slt2sultr2* triple mutant) deprived of S for 24 h. Transport assays were performed as a function of external SO<sub>4</sub><sup>2-</sup> concentrations: **A.** 0.02-0.2 μM; **B.** 2-200 μM. Initial rates of uptake are expressed as fmol of SO<sub>4</sub><sup>2-</sup> s<sup>-1</sup> (10<sup>5</sup> cells)<sup>-1</sup>. Values are averages of 2-3 technical replicates, and error bars represent one standard deviation.

## Supplemental Table S1

| Plasmid                | Doubling time (h) |
|------------------------|-------------------|
| Vector (pDR196-GW-GFP) | 5.91 ± 0.33       |
| AtSULTR1;2-GFP         | 3.52 ± 0.11       |
| SULTR2-GFP             | 5.49 ± 0.12       |
| SLT1-GFP               | 5.24 ± 0.25       |
| SLT2-GFP               | 5.09 ± 0.27       |

**Supplemental Table S1.** Growth rates of the CP60-1C strain harboring genes encoding Arabidopsis SULTR1;2 or various Chlamydomonas  $\text{SO}_4^{2-}$  transporters. Doubling time (in h) is measured as a change in  $A_{600}$ .



| Primer          | Sequence                           |
|-----------------|------------------------------------|
| SULTR2-5'UTR-F1 | 5'- TAACGGGCCTCCGCAAGACA -3'       |
| SULTR2-F8       | 5'- TTCCCTCCGTGTACGGCCTGTA -3'     |
| SULTR2-F9       | 5'- GCCGCCTTAGCCGAAGCTTAGT -3'     |
| SULTR2-D        | 5'- GCTTCCTTCCTGGGAGTGCT -3'       |
| SULTR2-E        | 5'- AGGATGCGGCTCTACCCAAT -3'       |
| SULTR2-K        | 5'- CTGTGAGGCGAGGCGATAGATG -3'     |
| SULTR2-G        | 5'- AGCAGGCAGTGGGATTGAAA -3'       |
| SULTR2-R5       | 5'- GCCCAGACCGATCTCCACACTGA -3'    |
| SULTR2-I        | 5'- CGAAGTGCGGATAGGAGGAG -3'       |
| SULTR2-J        | 5'- TGCAGGGAAGTGCCTGGTA -3'        |
| SLT1-5'UTR-F1   | 5'-TGCTCACTTACATAGTCAGGCGCG-3'     |
| SLT1-SEQ-F3     | 5'-AAGTCCAAGCAGGTCGACCA-3'         |
| SLT1-SEQ-F5     | 5'-GCAAGACCAGTGACCTGATCG-3'        |
| SLT1-SEQ-F7     | 5'-GCAGGAGCAGGTGGACAAGA-3'         |
| SLT1-SEQ-F10    | 5'-ACCTCCGTCGCCATCATGCT-3'         |
| SLT1-3'UTR-R1   | 5'-GCTTCTGTTCACAGGATTACATTCAA-3'   |
| SLT1-SEQ-R3     | 5'-TGGGTAGCAGGAAGTACAGCGC-3'       |
| SLT1-SEQ-R4     | 5'-TGTCCTGGACCTTGAGCGGGAT-3'       |
| SLT1-SEQ-R5     | 5'-TGTC AAGCAGCAGCACATCGCC-3'      |
| SLT1-SEQ-R6     | 5'-TCCTGCAGACCCACGATGACCA-3'       |
| P-SLT2-F1       | 5'- CGCTGCTGGAAAAGCATATGCAATTC -3' |
| SLT2-SEQ-F2     | 5'- CAACCTGGTCATCGTCGGTC -3'       |
| SLT2-F8         | 5'- GCGGGTACTGGACAGTTGGACACA -3'   |
| SLT2-F6         | 5'- TTGCCCTATCACACAGGATGACAC -3'   |
| SLT2-F2         | 5'- CAACCGGGTTGCAACTTCCTGAT -3'    |
| SLT2-R10        | 5'- GAAACCCGTTCCCTGCTGCAGT -3'     |
| SLT2-R8         | 5'- TGGTGTCCAGGATGAGCACGTC -3'     |
| SLT2-R13        | 5'- CTGTGTGATAGGGGCAACGACAAT -3'   |
| SLT2-R12        | 5'- TTGAATTGCGGCAGATGGTGTAAC -3'   |
| SLT2-3'UTR-R2   | 5'- TCGGTCCGCGCAACTTCTTTGT -3'     |

**Supplemental Table S2.** List of *SULTR2*-, *SLT1*- and *SLT2*-specific primers used for PCR screening of the insertion library.

| <b>Strain</b>         | <b>K<sub>1/2</sub> (μM)</b> |
|-----------------------|-----------------------------|
| Wild-type             | 4.12 ± 2.25                 |
| <i>slt1</i>           | 4.75 ± 1.42                 |
| <i>slt2</i>           | 6.85 ± 0.49                 |
| <i>sultr2</i>         | 4.42 ± 1.04                 |
| <i>slt1slt2</i>       | 3.11 ± 1.15                 |
| <i>slt1sultr2</i>     | 4.69 ± 0.94                 |
| <i>slt2sultr2</i>     | 4.80 ± 0.32                 |
| <i>slt1slt2sultr2</i> | 5.92 ± 1.59                 |

**Supplemental Table S3.** Characteristics of SO<sub>4</sub><sup>2-</sup> transport in wild-type cells, single, double and triple SO<sub>4</sub><sup>2-</sup> transporter mutants after 24 h of S deprivation. K<sub>1/2</sub> (in μM) is calculated from the initial rates using a Michaelis-Menten equation. Values are averages of 2-4 biological replicates with each experiment performed in duplicate. Error bars represent one standard deviation.

## SUPPLEMENTAL MATERIALS AND METHODS

**Yeast strain, media and growth conditions:** The strain of *Saccharomyces cerevisiae* used in this study was CP60-1C (*MATa his3 leu2 ura3 trp1 sul1-1 sul2-1*), which harbors mutations in both high-affinity  $\text{SO}_4^{2-}$  transporters (*SUL1* and *SUL2*) (Cherest et al., 1997). CP60-1C transformants were grown at 30°C in synthetic defined (SD) –Met –Ura liquid medium supplemented with 100  $\mu\text{M}$   $\text{MgSO}_4$ . Cell growth was evaluated by measuring optical density of the cultures at 600 nm ( $A_{600}$ ) in a DU640 spectrophotometer (Beckman Coulter, CA).

**Construction of GFP-tagged  $\text{SO}_4^{2-}$  transporters, yeast transformation and microscopy:** Full-length cDNAs encoding  $\text{SO}_4^{2-}$  transporters were cloned into pDR196-GW (no tag) or pDR196-GW-GFP (GFP was fused in-frame to the transporters at the carboxyl terminus). The pDR196-GW and pDR196-GW-GFP plasmids were kind gifts from Dr. Dominique Loque. The transporters were expressed in yeast under the control of the constitutive *PMA1* promoter. The constructs carrying  $\text{SO}_4^{2-}$  transporters were transformed into the yeast mutant CP60-1C, using the lithium-acetate procedure (Rose et al., 1990). Transformants were selected on SD medium lacking uracil and then grown in liquid medium to mid-logarithmic phase. For microscopy, a drop of cell suspension was mounted onto slides and GFP fluorescence was detected as previously described (using a Nikon TMD200 inverted fluorescence microscope equipped with a Nikon 60X 1.2-numerical aperture water immersion objective and a Biorad MRC 1024 confocal head) (Shibagaki and Grossman, 2004).

**Yeast protein isolation and immunoblot analysis:** Cells in mid-logarithmic phase ( $A_{600} \sim 0.2$ ) were harvested by centrifugation (3000 X *g* for 5 min), washed once with ice-cold STE10 buffer (10% w/v sucrose, 5 mM Tris pH 7.4, 10 mM EDTA) and resuspended in the same buffer containing protease inhibitor cocktail (Calbiochem, Gibbstown, NJ). Cells were disrupted by agitation with glass beads (425 – 600  $\mu\text{M}$ ) and the cell debris was removed by a brief centrifugation (3000 X *g* for 5 min). The supernatant was centrifuged at 100,000 X *g* for 50 min to obtain a microsomal pellet, which was then resuspended in the STE10 buffer. An equal vol of loading buffer (6.25 mM Tris-HCl, pH

6.8, 5 % SDS, 6 M urea, 500 mM dithiothreitol, 10 % glycerol and 0.002 % bromophenol blue) was added to the samples prior to an incubation at 42°C for 15 min. Solubilized polypeptides were resolved by SDS-PAGE and the immunoblot performed as described in the **MATERIALS AND METHODS**. Dilutions of primary antibodies used were: 1:1000 anti-PMA1 (ABCam, Cambridge, MA) and 1:1000 anti-GFP (Roche, Nutley, NJ). A 1:10,000 dilution of horseradish peroxidase-conjugated anti-rabbit IgG (Promega, Madison, WI) or 1:10,000 dilution of horseradish peroxidase-conjugated anti-mouse IgG (Sigma, St. Louis, MO) was used as a secondary antibody. The peroxidase activity was detected by an enhanced chemiluminescence assay (Amersham Biosciences, Sweden).

### **SUPPLEMENTAL REFERENCES**

- Cherest, H., Davidian, J.-C., Thomas, D., Benes, V., Ansorge, W., and Surdin-ker Jan, Y. (1997). Molecular characterization of two high affinity sulfate transporters in *Saccharomyces cerevisiae*. *Genetics* 145: 627-637.
- Rose, M.D., Winston, F., and Heiter, P. (1990). *Methods in Yeast Genetics*. (Cold Spring Harbor, NY: Cold Spring Harbor Laboratory Press).
- Shibagaki, N., and Grossman, A.R. (2004). Probing the function of STAS domains of the *Arabidopsis* sulfate transporters. *J Biol Chem* 279: 30791-30799.
